# Supplementary material for: Identifying Urinary Tract Infection–Related Information in Home Care Nursing Notes
Source: PubMed Central journal article supplement (PMC8106637; doi:10.1016/j.jamda.2020.12.010), 2021-01-09
Supplement: NIHMS1656905-supplement-1.pdf [file NIHMS1656905-supplement-1.pdf]

**A** Documentation of UTI symptoms (specific or non-specific, all notes)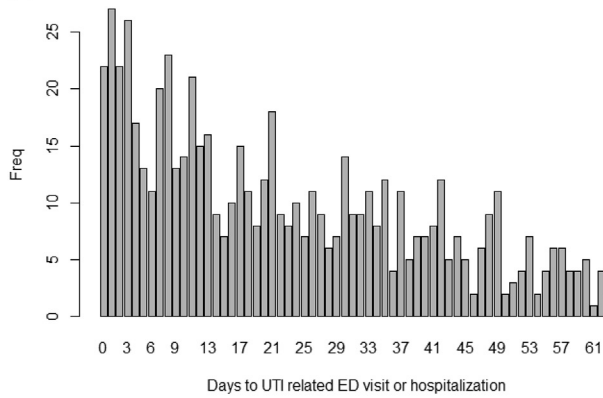**B** Documentation of UTI symptoms (specific or non-specific, care coordination notes only)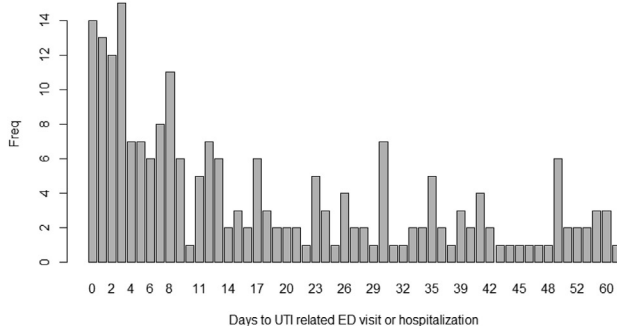**C** Documentation of UTI symptoms (specific or non-specific, visit notes only)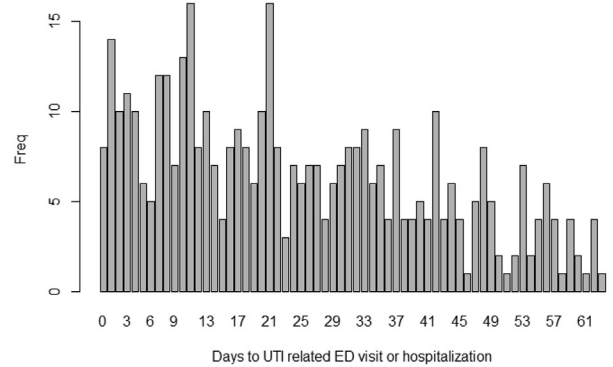

**Supplementary Fig. 1.** Frequency of documentation of any UTI-specific and UTI-nonspecific symptoms over time among patients who were admitted to ED or hospitalized with UTI: (A) all notes; (B) care coordination notes only; (C) visit notes only. Frequency of UTI-specific and UTI-nonspecific symptoms documentation increased close to UTI-related hospitalization or ED admission, peaking within a few days before the event (A-C). UTI-specific and UTI-nonspecific symptoms documented in care coordination notes had spiked within a few days before UTI-related hospitalization or ED admission (B), whereas similar documentation in visit notes remained fairly stable over time (C). ED, emergency department; UTI, urinary tract infection.

**Supplementary Table 1**

Vocabulary Discovery by Different Language Models

|                                                               | UTI-Specific Names | UTI-Specific Symptoms | UTI-Nonspecific Symptoms | Nausea and Vomiting | Fever | Confusion |
|---------------------------------------------------------------|--------------------|-----------------------|--------------------------|---------------------|-------|-----------|
| No. of similar terms prepopulated from standard terminologies | 43                 | 89                    | 49                       | 34                  | 35    | 31        |
| No. of similar terms added from baseline model*               | 18                 | 66                    | 38                       | 143                 | 79    | 188       |
| % of similar terms added to prepopulated similar terms        | 42                 | 74                    | 78                       | 421                 | 226   | 606       |
| No. of similar terms added from PubMed model <sup>†</sup>     | 52                 | 28                    | 12                       | 99                  | 44    | 130       |
| % of similar terms added to prepopulated similar terms        | 121                | 31                    | 24                       | 291                 | 126   | 419       |
| Total unique similar terms (all models)                       | 113                | 183                   | 99                       | 276                 | 158   | 349       |

\*Baseline model: UTI language model developed by NLP program (NimbleMiner) using ~2.6 million home care notes.

<sup>†</sup>PubMed model: UTI language model developed by NLP program (NimbleMiner) using PubMed abstracts (n=46,592).**Supplementary Table 2**

NLP System Performance With 95% CI

|                          | All Simclins |              |           |              |           |              |
|--------------------------|--------------|--------------|-----------|--------------|-----------|--------------|
|                          | Recall       | (95% CI)     | Precision | (95% CI)     | F Measure | (95% CI)     |
| UTI names                | 0.95         | (0.94, 0.96) | 0.91      | (0.90, 0.92) | 0.93      | (0.89, 0.97) |
| UTI-specific symptoms    | 0.77         | (0.73, 0.81) | 0.74      | (0.71, 0.77) | 0.75      | (0.74, 0.77) |
| UTI-nonspecific symptoms | 0.71         | (0.69, 0.73) | 0.78      | (0.76, 0.80) | 0.74      | (0.73, 0.75) |
| Nausea and vomiting      | 0.87         | (0.85, 0.89) | 0.91      | (0.88, 0.94) | 0.89      | (0.85, 0.93) |
| Fever                    | 0.94         | (0.91, 0.97) | 0.93      | (0.92, 0.94) | 0.93      | (0.92, 0.95) |
| Confusion                | 0.83         | (0.83, 0.83) | 0.82      | (0.80, 0.84) | 0.82      | (0.78, 0.87) |
| All categories           | 0.89         | (0.86, 0.92) | 0.91      | (0.88, 0.94) | 0.90      | (0.87, 0.93) |
